# Supplementary material for: First measurements of the Fe oxidation state of spinel inclusions in olivine single crystals from Vulture (Italy) with the in situ synchrotron micro-Mössbauer technique
Source: Copernicus journal article supplement (doi:10.5194/ejm-35-665-2023), 2023-08-21
Supplement: Supplementary file 1 [file ejm-35-665-2023-supplement.pdf]

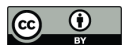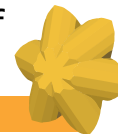

*Supplement of*

**First measurements of the Fe oxidation state of spinel inclusions in olivine single crystals from Vulture (Italy) with the in situ synchrotron micro-Mössbauer technique**

**Giulia Marras et al.**

*Correspondence to:* Giulia Marras ([giulia.marras@uniroma1.it](mailto:giulia.marras@uniroma1.it)) and Vincenzo Stagno ([vincenzo.stagno@uniroma1.it](mailto:vincenzo.stagno@uniroma1.it))

The copyright of individual parts of the supplement might differ from the article licence.

**Table S1 Literature chemical composition for Vulture olivines in wehrlitic lapilli, loose xenocrystals and wehrlitic xenoliths.**

| References                     | Sample   | Comment  | SiO <sub>2</sub> | FeO <sub>tot</sub> | MnO  | MgO   | CaO  | Cr <sub>2</sub> O <sub>3</sub> | NiO  | Tot.   | Mg#  | Fo   | Fa   |
|--------------------------------|----------|----------|------------------|--------------------|------|-------|------|--------------------------------|------|--------|------|------|------|
| <i>Carnevale et al. (2022)</i> | ol-lap1  | core     | 41.70            | 8.97               | 0.14 | 49.60 | 0.09 | 0.03                           | 0.38 | 100.95 | 0.91 | 90.8 | 9.21 |
| <i>Carnevale et al. (2022)</i> | ol-lap2  | core     | 41.70            | 9.15               | 0.14 | 49.80 | 0.09 | 0.03                           | 0.37 | 101.27 | 0.91 | 90.7 | 9.35 |
| <i>Carnevale et al. (2022)</i> | ol-lap3  | core     | 42.00            | 9.02               | 0.14 | 49.70 | 0.08 | 0.03                           | 0.38 | 101.28 | 0.91 | 90.8 | 9.25 |
| <i>Carnevale et al. (2022)</i> | ol-lap4  | core     | 42.00            | 8.97               | 0.14 | 49.70 | 0.09 | 0.03                           | 0.37 | 101.35 | 0.91 | 90.8 | 9.19 |
| <i>Carnevale et al. (2022)</i> | ol-lap5  | core     | 40.80            | 9.03               | 0.13 | 50.10 | 0.09 | 0.03                           | 0.39 | 100.52 | 0.91 | 90.8 | 9.18 |
| <i>Carnevale et al. (2022)</i> | ol-lap6  | core     | 40.70            | 10.07              | 0.16 | 50.80 | 0.10 | 0.03                           | 0.35 | 102.16 | 0.90 | 90.0 | 10.0 |
| <i>Carnevale et al. (2022)</i> | ol-lap7  | core     | 40.20            | 9.00               | 0.14 | 51.50 | 0.09 | 0.03                           | 0.37 | 101.33 | 0.91 | 91.1 | 8.93 |
| <i>Carnevale et al. (2022)</i> | ol-xeno1 | loose    | 40.50            | 9.36               | 0.14 | 49.90 | 0.15 | 0.03                           | 0.38 | 100.43 | 0.90 | 90.5 | 9.52 |
| <i>Carnevale et al. (2022)</i> | ol-xeno2 | loose    | 39.70            | 10.35              | 0.15 | 49.00 | 0.14 | 0.02                           | 0.37 | 99.64  | 0.89 | 89.4 | 10.6 |
| <i>Carnevale et al. (2022)</i> | ol-xeno3 | loose    | 40.60            | 8.11               | 0.11 | 50.80 | 0.19 | 0.04                           | 0.41 | 100.16 | 0.92 | 91.8 | 8.22 |
| <i>Carnevale et al. (2022)</i> | ol-xeno4 | loose    | 41.50            | 9.66               | 0.13 | 50.70 | 0.18 | 0.02                           | 0.37 | 102.59 | 0.9  | 90.4 | 9.65 |
| <i>Carnevale et al. (2022)</i> | ol-xeno5 | loose    | 40.10            | 9.06               | 0.12 | 49.80 | 0.12 | 0.04                           | 0.4  | 99.66  | 0.91 | 90.8 | 9.25 |
| <i>Carnevale et al. (2022)</i> | ol-xeno6 | loose    | 41.70            | 8.49               | 0.11 | 49.60 | 0.18 | 0.03                           | 0.39 | 100.48 | 0.91 | 91.2 | 8.76 |
| <i>Carnevale et al. (2022)</i> | ol-xeno7 | loose    | 41.00            | 10.11              | 0.14 | 50.30 | 0.14 | 0.02                           | 0.37 | 102.07 | 0.90 | 89.9 | 10.1 |
| <i>Jones et al. (2000)</i>     | aj24     | xenolith | 40.40            | 9.94               | 0.16 | 48.80 | 0.13 | 0.08                           | 0.33 | 99.83  | 0.90 | 89.7 | 10.3 |
| <i>Jones et al. (2000)</i>     | aj34     | xenolith | 40.70            | 9.31               | 0.15 | 49.40 | 0.13 | 0.04                           | 0.28 | 100.02 | 0.90 | 89.8 | 10.2 |

**Table S2 Literature chemical composition for Vulture spinels from wehrlitic xenoliths.**

| References                        | Sample | SiO <sub>2</sub> | NiO  | MgO   | CaO  | FeO   | Al <sub>2</sub> O <sub>3</sub> | TiO <sub>2</sub> | MnO  | Cr <sub>2</sub> O <sub>3</sub> | Na <sub>2</sub> O | K <sub>2</sub> O | Total | Cr#  | Mg#  |
|-----------------------------------|--------|------------------|------|-------|------|-------|--------------------------------|------------------|------|--------------------------------|-------------------|------------------|-------|------|------|
| <i>Jones et al. (2000)</i>        | aj7    | 0.09             | 0.23 | 18.82 | 0.06 | 13.42 | 34.43                          | 0.43             | 0.21 | 31.86                          | 0.02              | 0.01             | 99.58 | 0.38 | 0.8  |
| <i>Jones et al. (2000)</i>        | aj8    | 0.06             | 0.07 | 14.32 | 0.01 | 24.42 | 27.07                          | 1.12             | 0.25 | 31.91                          | -                 | 0.01             | 99.24 | 0.44 | 0.63 |
| <i>Jones et al. (2000)</i>        | aj23   | 0.06             | 0.27 | 18.02 | 0.01 | 13.6  | 37.09                          | 0.17             | 0.15 | 30.46                          | 0.01              | 0.02             | 99.86 | 0.39 | 0.76 |
| <i>Jones et al. (2000)</i>        | aj34   | 0.05             | 0.31 | 17.78 | 0.11 | 15.64 | 34                             | 0.55             | 0.19 | 31.1                           | 0.02              | 0.01             | 99.76 | 0.38 | 0.77 |
| <i>Stoppa and Principe (1997)</i> | MLF    | 0.18             | -    | 17.4  | -    | 17.06 | 27.9                           | 0.61             | 0.32 | 32.8                           | -                 | -                | 96.27 | 0.44 | 0.66 |

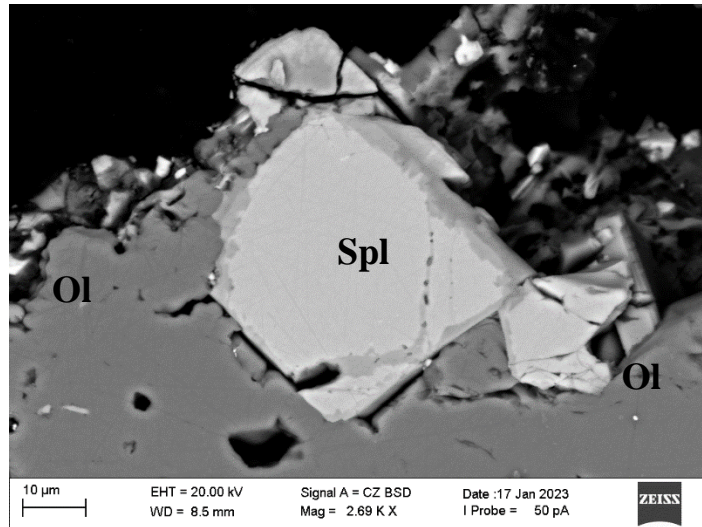

Mg Kα1\_2

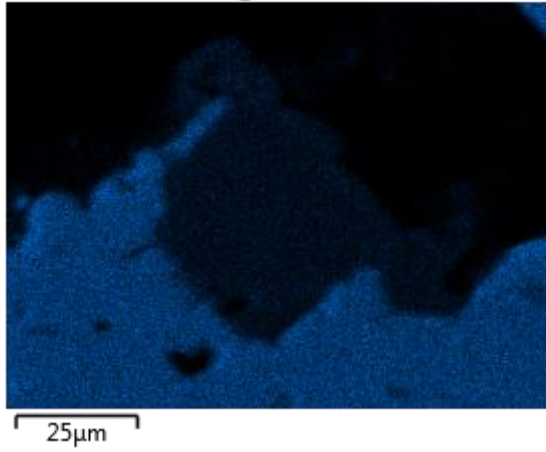

Al Kα1

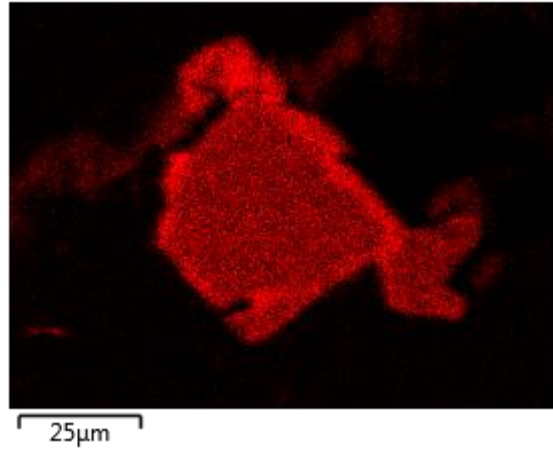

Cr Kα1

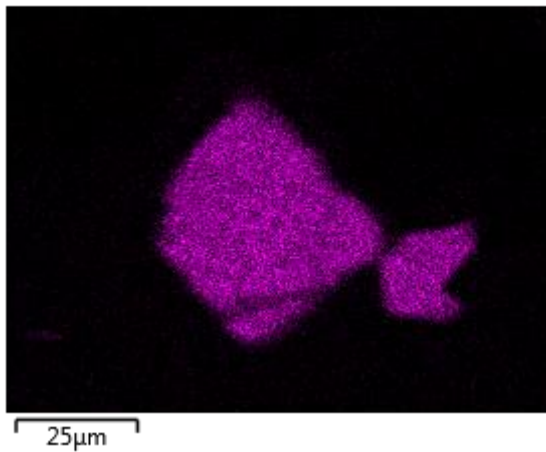

Fe Kα1

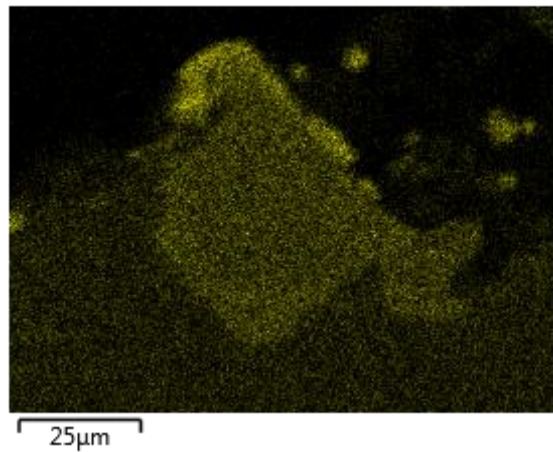

**Figure S1** Semi-quantitative chemical map of Spinel\_5 hosted in Olivine Vul\_2.

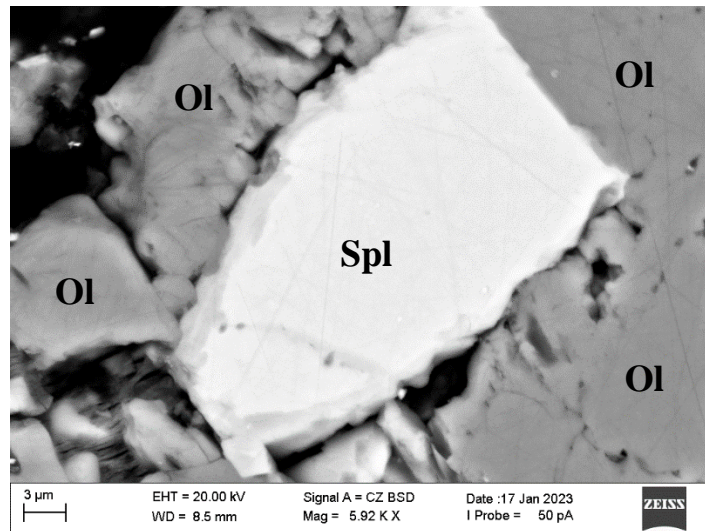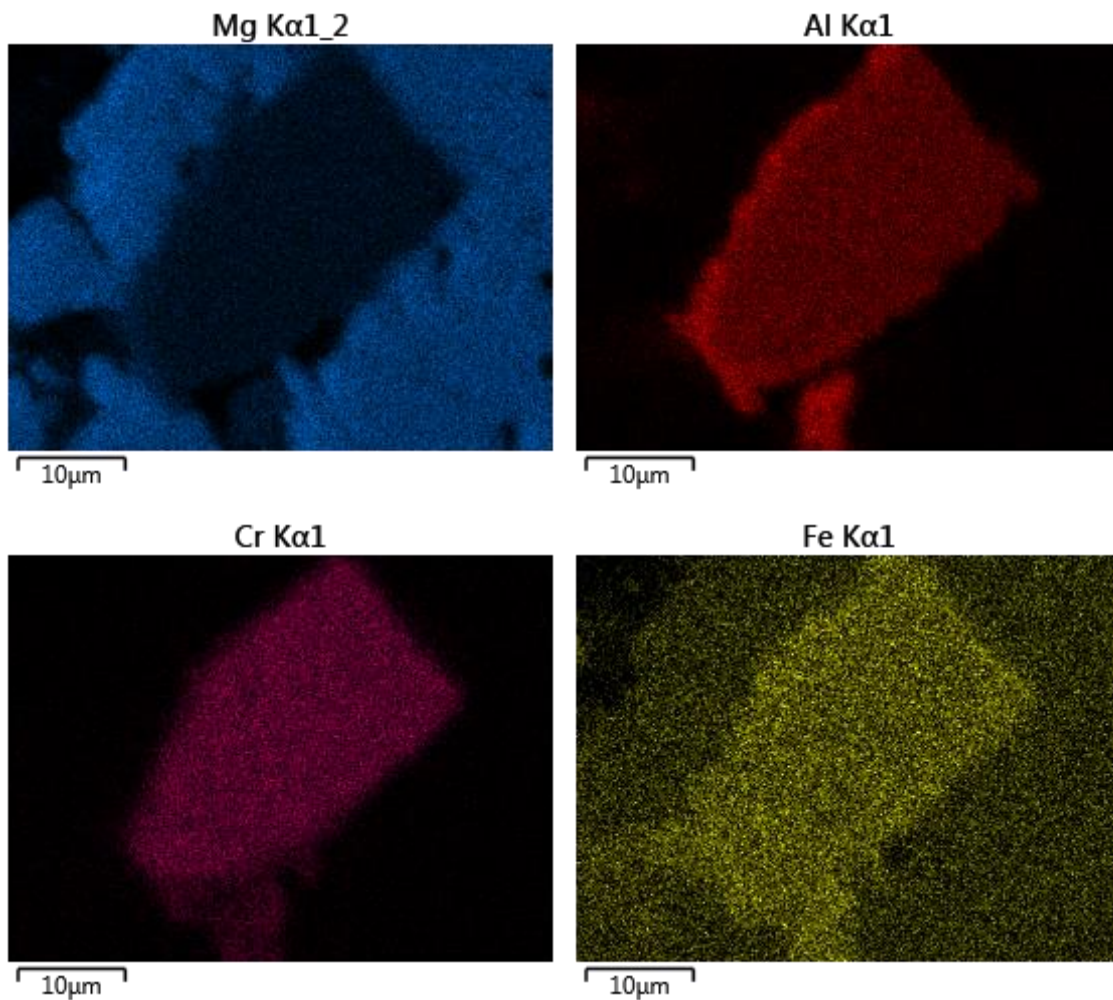

**Figure S2** Semi-quantitative chemical map of Spinel<sub>6</sub> hosted in Olivine Vul<sub>2</sub>.

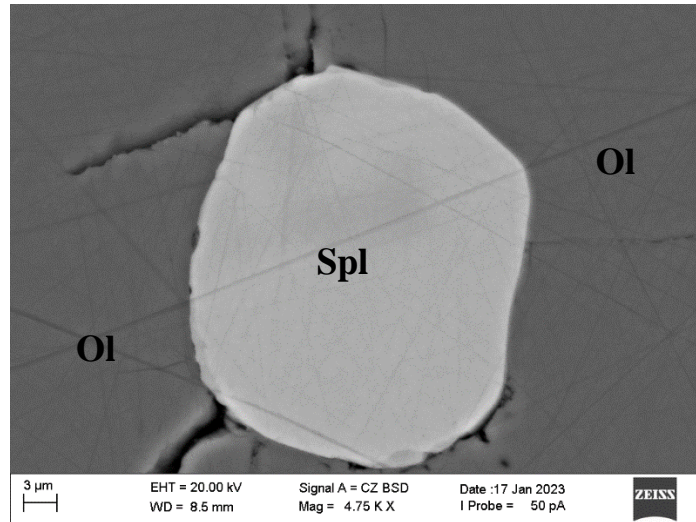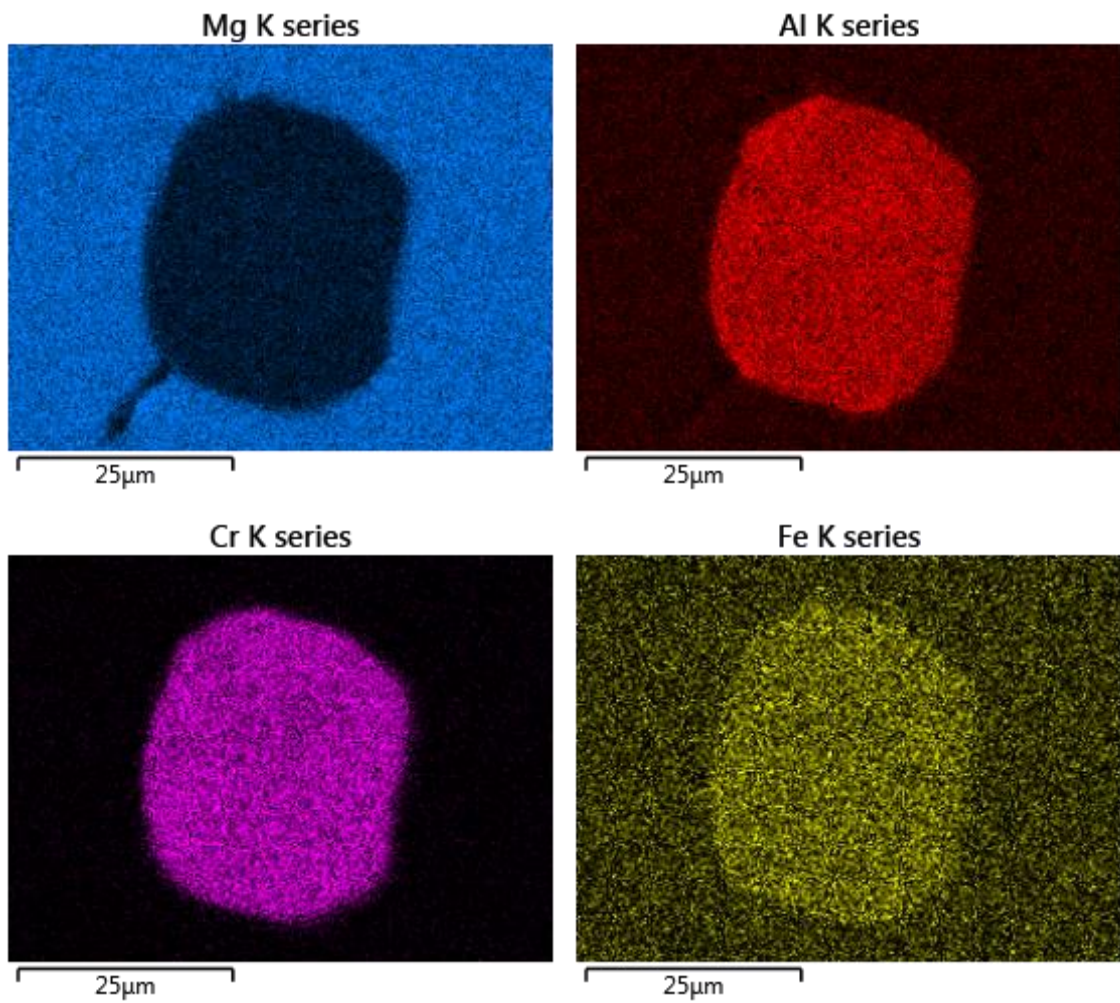

**Figure S3** Semi-quantitative chemical map of Spinel\_6 hosted in Olivine Vul\_3.

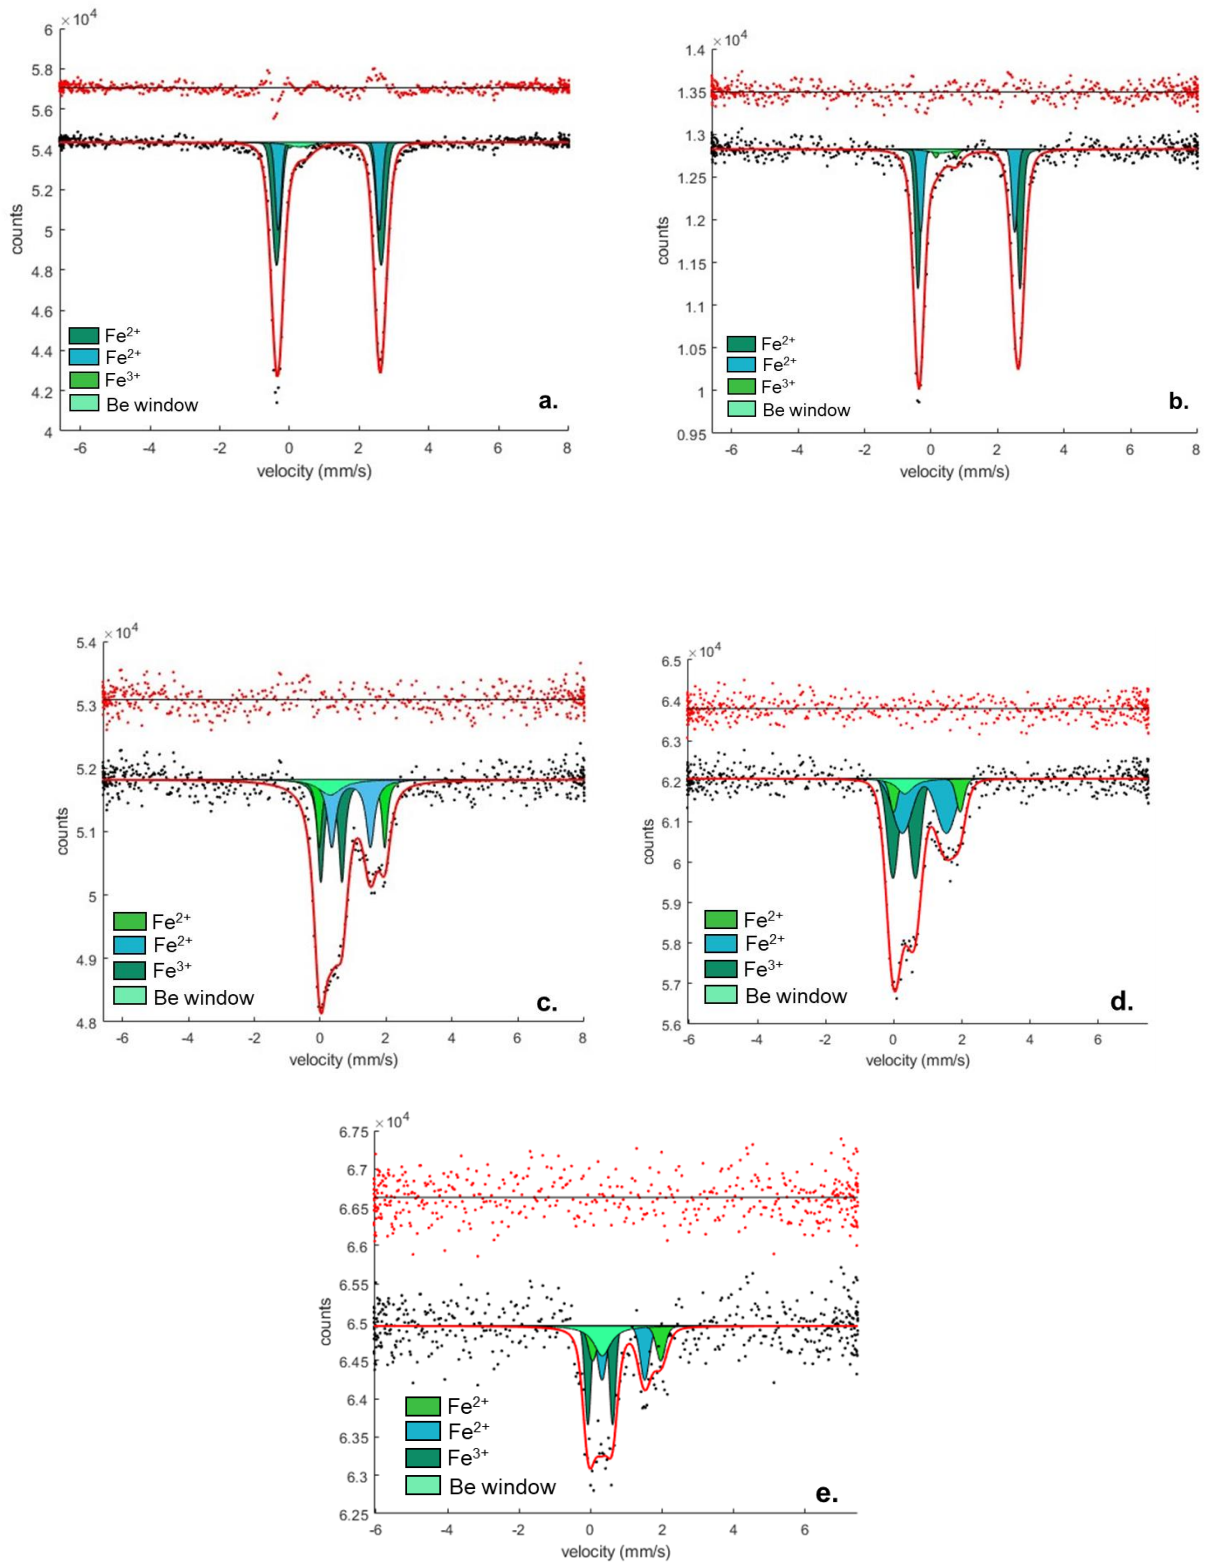

**Figure S4** SMS spectra for Olivine Vul\_1a, panel a; Olivine Vul\_1c, panel b; Spinel\_2, panel c, Spinel\_5, panel d; Spinel\_6, panel e.
